# Supplementary material
Source: publisher figshare collection journal article supplement (https://acs.figshare.com/ndownloader/files/4198045)
Supplement: Supplementary file 1 [file 4198045]

data_compound1
 
_audit_creation_method            SHELXL-97
_chemical_name_systematic
;
 ?
;
_chemical_name_common             ?
_chemical_melting_point           ?
_chemical_formula_moiety          'C9 H12 Co N2 O7'
_chemical_formula_sum
 'C9 H12 Co N2 O7'
_chemical_formula_weight          319.13
 
loop_
 _atom_type_symbol
 _atom_type_description
 _atom_type_scat_dispersion_real
 _atom_type_scat_dispersion_imag
 _atom_type_scat_source
 'C'  'C'   0.0033   0.0016
 'International Tables Vol C Tables 4.2.6.8 and 6.1.1.4'
 'H'  'H'   0.0000   0.0000
 'International Tables Vol C Tables 4.2.6.8 and 6.1.1.4'
 'N'  'N'   0.0061   0.0033
 'International Tables Vol C Tables 4.2.6.8 and 6.1.1.4'
 'O'  'O'   0.0106   0.0060
 'International Tables Vol C Tables 4.2.6.8 and 6.1.1.4'
 'Co'  'Co'   0.3494   0.9721
 'International Tables Vol C Tables 4.2.6.8 and 6.1.1.4'
 
_symmetry_cell_setting            Orthorhombic
_symmetry_space_group_name_H-M    P21212
 
loop_
 _symmetry_equiv_pos_as_xyz
 'x, y, z'
 '-x, -y, z'
 'x+1/2, -y+1/2, -z'
 '-x+1/2, y+1/2, -z'
 
_cell_length_a                    26.282(5)
_cell_length_b                    6.620(5)
_cell_length_c                    7.667(5)
_cell_angle_alpha                 90.000(5)
_cell_angle_beta                  90.000(5)
_cell_angle_gamma                 90.000(5)
_cell_volume                      1334.0(14)
_cell_formula_units_Z             4
_cell_measurement_temperature     293(2)
_cell_measurement_reflns_used     ?
_cell_measurement_theta_min       ?
_cell_measurement_theta_max       ?
 
_exptl_crystal_description        reactangular
_exptl_crystal_colour             orange-red
_exptl_crystal_size_max           0.42
_exptl_crystal_size_mid           0.34
_exptl_crystal_size_min           0.25
_exptl_crystal_density_meas       ?
_exptl_crystal_density_diffrn     1.564
_exptl_crystal_density_method     'not measured'
_exptl_crystal_F_000              632
_exptl_absorpt_coefficient_mu     1.315
_exptl_absorpt_correction_type    Empirical
_exptl_absorpt_correction_T_min   0.1182
_exptl_absorpt_correction_T_max   0.9624
_exptl_absorpt_process_details    Sadabs
 
_exptl_special_details
;
 ?
;
 
_diffrn_ambient_temperature       293(2)
_diffrn_radiation_wavelength      0.71073
_diffrn_radiation_type            MoK\a
_diffrn_radiation_source          'fine-focus sealed tube'
_diffrn_radiation_monochromator   graphite
_diffrn_measurement_device_type   ?
_diffrn_measurement_method        ?
_diffrn_detector_area_resol_mean  ?
_diffrn_standards_number          ?
_diffrn_standards_interval_count  ?
_diffrn_standards_interval_time   ?
_diffrn_standards_decay_%         ?
_diffrn_reflns_number             11386
_diffrn_reflns_av_R_equivalents   0.0976
_diffrn_reflns_av_sigmaI/netI     0.0834
_diffrn_reflns_limit_h_min        -32
_diffrn_reflns_limit_h_max        32
_diffrn_reflns_limit_k_min        -8
_diffrn_reflns_limit_k_max        6
_diffrn_reflns_limit_l_min        -9
_diffrn_reflns_limit_l_max        9
_diffrn_reflns_theta_min          1.55
_diffrn_reflns_theta_max          25.79
_reflns_number_total              2575
_reflns_number_gt                 1912
_reflns_threshold_expression      >2sigma(I)
 
_computing_data_collection        'Bruker SMART'
_computing_cell_refinement        'Bruker SMART'
_computing_data_reduction         'Bruker SAINT'
_computing_structure_solution     'SHELXS-97 (Sheldrick, 1990)'
_computing_structure_refinement   'SHELXL-97 (Sheldrick, 1997)'
_computing_molecular_graphics     'Bruker SHELXTL'
_computing_publication_material   'Bruker SHELXTL'
 
_refine_special_details
;
 Refinement of F^2^ against ALL reflections.  The weighted R-factor wR and
 goodness of fit S are based on F^2^, conventional R-factors R are based
 on F, with F set to zero for negative F^2^. The threshold expression of
 F^2^ > 2sigma(F^2^) is used only for calculating R-factors(gt) etc. and is
 not relevant to the choice of reflections for refinement.  R-factors based
 on F^2^ are statistically about twice as large as those based on F, and R-
 factors based on ALL data will be even larger.
;
 
_refine_ls_structure_factor_coef  Fsqd
_refine_ls_matrix_type            full
_refine_ls_weighting_scheme       calc
_refine_ls_weighting_details
 'calc w=1/[\s^2^(Fo^2^)+(0.1074P)^2^+0.7361P] where P=(Fo^2^+2Fc^2^)/3'
_atom_sites_solution_primary      direct
_atom_sites_solution_secondary    difmap
_atom_sites_solution_hydrogens    geom
_refine_ls_hydrogen_treatment     noref
_refine_ls_extinction_method      none
_refine_ls_extinction_coef        ?
_refine_ls_abs_structure_details
 'Flack H D (1983), Acta Cryst. A39, 876-881'
_refine_ls_abs_structure_Flack    0.00(6)
_refine_ls_number_reflns          2575
_refine_ls_number_parameters      162
_refine_ls_number_restraints      0
_refine_ls_R_factor_all           0.0901
_refine_ls_R_factor_gt            0.0647
_refine_ls_wR_factor_ref          0.1893
_refine_ls_wR_factor_gt           0.1713
_refine_ls_goodness_of_fit_ref    1.065
_refine_ls_restrained_S_all       1.065
_refine_ls_shift/su_max           0.000
_refine_ls_shift/su_mean          0.000
 
loop_
 _atom_site_label
 _atom_site_type_symbol
 _atom_site_fract_x
 _atom_site_fract_y
 _atom_site_fract_z
 _atom_site_U_iso_or_equiv
 _atom_site_adp_type
 _atom_site_occupancy
 _atom_site_symmetry_multiplicity
 _atom_site_calc_flag
 _atom_site_refinement_flags
 _atom_site_disorder_assembly
 _atom_site_disorder_group
C1 C 0.7916(3) -0.1499(11) 0.5164(9) 0.0265(16) Uani 1 1 d . . .
C2 C 0.8218(3) -0.0278(11) 0.6477(9) 0.0271(16) Uani 1 1 d . . .
H2 H 0.8517 0.0276 0.5883 0.033 Uiso 1 1 calc R . .
C3 C 0.8403(3) -0.1596(12) 0.7978(9) 0.0298(17) Uani 1 1 d . . .
H3A H 0.8649 -0.0829 0.8648 0.036 Uiso 1 1 calc R . .
H3B H 0.8579 -0.2752 0.7490 0.036 Uiso 1 1 calc R . .
C4 C 0.7994(3) -0.2370(12) 0.9226(10) 0.0289(17) Uani 1 1 d . . .
C5 C 0.6060(3) -0.0977(13) 0.6606(12) 0.040(2) Uani 1 1 d . . .
H10 H 0.6051 0.0334 0.6171 0.048 Uiso 1 1 calc R . .
C6 C 0.5623(3) -0.2143(13) 0.6499(13) 0.044(2) Uani 1 1 d . . .
H9 H 0.5328 -0.1626 0.6000 0.053 Uiso 1 1 calc R . .
C7 C 0.5635(3) -0.4083(12) 0.7149(11) 0.039(2) Uani 1 1 d . . .
C8 C 0.6084(3) -0.4853(12) 0.7794(8) 0.0324(17) Uani 1 1 d . . .
H7 H 0.6110 -0.6186 0.8166 0.039 Uiso 1 1 calc R . .
C9 C 0.6497(3) -0.3542(11) 0.7862(8) 0.0287(17) Uani 1 1 d . . .
H6 H 0.6798 -0.4039 0.8338 0.034 Uiso 1 1 calc R . .
N1 N 0.6500(2) -0.1655(9) 0.7310(8) 0.0288(13) Uani 1 1 d . . .
N2 N 0.5208(2) -0.5421(10) 0.7129(9) 0.0417(17) Uani 1 1 d . . .
O1 O 0.74359(18) -0.1260(8) 0.5202(6) 0.0282(11) Uani 1 1 d . . .
O5 O 0.79343(18) 0.1382(7) 0.7207(6) 0.0319(12) Uani 1 1 d . . .
O3 O 0.75304(19) -0.2038(8) 0.8990(7) 0.0309(12) Uani 1 1 d . . .
O4 O 0.68336(18) 0.1590(8) 0.9537(6) 0.0297(12) Uani 1 1 d . . .
O2 O 0.68460(19) 0.2327(8) 0.5795(6) 0.0272(12) Uani 1 1 d . . .
Co1 Co 0.71664(3) 0.01416(12) 0.74929(11) 0.0238(3) Uani 1 1 d . . .
O1W O 0.4803(12) -0.111(5) 0.131(4) 0.366(17) Uiso 1 1 d . . .
O2W O 0.9448(17) -0.709(7) 0.841(6) 0.59(3) Uiso 1 1 d . . .
 
loop_
 _atom_site_aniso_label
 _atom_site_aniso_U_11
 _atom_site_aniso_U_22
 _atom_site_aniso_U_33
 _atom_site_aniso_U_23
 _atom_site_aniso_U_13
 _atom_site_aniso_U_12
C1 0.030(4) 0.026(4) 0.024(3) 0.005(3) -0.003(3) 0.004(3)
C2 0.026(4) 0.023(4) 0.031(4) 0.001(3) 0.001(3) -0.004(3)
C3 0.029(4) 0.034(4) 0.026(4) 0.002(3) 0.002(3) -0.001(3)
C4 0.028(4) 0.033(4) 0.026(4) -0.003(3) -0.002(3) -0.004(3)
C5 0.032(4) 0.031(5) 0.058(5) 0.009(4) -0.009(4) -0.008(4)
C6 0.026(4) 0.030(5) 0.077(7) 0.010(4) -0.012(4) 0.000(3)
C7 0.034(4) 0.035(4) 0.047(6) -0.009(4) 0.008(4) -0.005(3)
C8 0.039(4) 0.034(4) 0.024(4) -0.005(4) 0.001(3) -0.005(3)
C9 0.033(4) 0.027(4) 0.025(4) 0.000(3) 0.000(3) -0.003(3)
N1 0.025(3) 0.031(3) 0.030(3) -0.003(3) -0.003(3) -0.001(2)
N2 0.030(3) 0.041(4) 0.054(4) 0.001(3) -0.003(3) 0.002(3)
O1 0.026(3) 0.031(3) 0.027(3) -0.005(2) -0.001(2) 0.000(2)
O5 0.032(3) 0.029(3) 0.034(3) 0.002(2) -0.004(2) -0.003(2)
O3 0.024(3) 0.033(3) 0.037(3) 0.006(2) 0.000(2) 0.001(2)
O4 0.029(3) 0.031(3) 0.029(3) -0.005(2) -0.001(2) 0.002(2)
O2 0.029(3) 0.026(3) 0.027(3) 0.001(2) 0.005(2) 0.003(2)
Co1 0.0233(4) 0.0268(5) 0.0214(4) 0.0000(6) -0.0002(4) -0.0005(4)
 
_geom_special_details
;
 All esds (except the esd in the dihedral angle between two l.s. planes)
 are estimated using the full covariance matrix.  The cell esds are taken
 into account individually in the estimation of esds in distances, angles
 and torsion angles; correlations between esds in cell parameters are only
 used when they are defined by crystal symmetry.  An approximate (isotropic)
 treatment of cell esds is used for estimating esds involving l.s. planes.
;
 
loop_
 _geom_bond_atom_site_label_1
 _geom_bond_atom_site_label_2
 _geom_bond_distance
 _geom_bond_site_symmetry_2
 _geom_bond_publ_flag
C1 O2 1.239(8) 4_646 ?
C1 O1 1.273(8) . ?
C1 C2 1.516(9) . ?
C2 O5 1.441(8) . ?
C2 C3 1.523(9) . ?
C3 C4 1.527(10) . ?
C4 O3 1.252(9) . ?
C4 O4 1.257(9) 4_647 ?
C5 N1 1.352(10) . ?
C5 C6 1.387(11) . ?
C6 C7 1.378(11) . ?
C7 C8 1.378(11) . ?
C7 N2 1.429(10) . ?
C8 C9 1.391(10) . ?
C9 N1 1.319(9) . ?
N1 Co1 2.122(6) . ?
N2 N2 1.228(13) 2_645 ?
O1 Co1 2.109(5) . ?
O5 Co1 2.190(5) . ?
O3 Co1 2.077(5) . ?
O4 C4 1.257(9) 4_657 ?
O4 Co1 2.035(5) . ?
O2 C1 1.239(8) 4_656 ?
O2 Co1 2.121(5) . ?
O1W O1W 1.80(6) 2_655 ?
 
loop_
 _geom_angle_atom_site_label_1
 _geom_angle_atom_site_label_2
 _geom_angle_atom_site_label_3
 _geom_angle
 _geom_angle_site_symmetry_1
 _geom_angle_site_symmetry_3
 _geom_angle_publ_flag
O2 C1 O1 126.3(7) 4_646 . ?
O2 C1 C2 117.7(6) 4_646 . ?
O1 C1 C2 116.0(6) . . ?
O5 C2 C1 113.1(5) . . ?
O5 C2 C3 108.0(5) . . ?
C1 C2 C3 111.3(5) . . ?
C2 C3 C4 116.2(6) . . ?
O3 C4 O4 123.8(7) . 4_647 ?
O3 C4 C3 122.4(7) . . ?
O4 C4 C3 113.8(6) 4_647 . ?
N1 C5 C6 123.2(8) . . ?
C7 C6 C5 118.6(8) . . ?
C6 C7 C8 119.6(7) . . ?
C6 C7 N2 123.8(7) . . ?
C8 C7 N2 116.5(7) . . ?
C7 C8 C9 116.8(7) . . ?
N1 C9 C8 125.7(7) . . ?
C9 N1 C5 116.0(6) . . ?
C9 N1 Co1 120.9(5) . . ?
C5 N1 Co1 123.1(5) . . ?
N2 N2 C7 114.7(9) 2_645 . ?
C1 O1 Co1 114.0(4) . . ?
C2 O5 Co1 103.3(4) . . ?
C4 O3 Co1 130.6(5) . . ?
C4 O4 Co1 133.2(5) 4_657 . ?
C1 O2 Co1 126.3(5) 4_656 . ?
O4 Co1 O3 95.7(2) . . ?
O4 Co1 O1 173.28(19) . . ?
O3 Co1 O1 90.0(2) . . ?
O4 Co1 O2 88.9(2) . . ?
O3 Co1 O2 174.89(19) . . ?
O1 Co1 O2 85.5(2) . . ?
O4 Co1 N1 87.7(2) . . ?
O3 Co1 N1 91.6(2) . . ?
O1 Co1 N1 88.6(2) . . ?
O2 Co1 N1 90.8(2) . . ?
O4 Co1 O5 107.3(2) . . ?
O3 Co1 O5 83.76(19) . . ?
O1 Co1 O5 76.82(19) . . ?
O2 Co1 O5 92.79(19) . . ?
N1 Co1 O5 164.7(2) . . ?
 
_diffrn_measured_fraction_theta_max    0.999
_diffrn_reflns_theta_full              25.79
_diffrn_measured_fraction_theta_full   0.999
_refine_diff_density_max    1.440
_refine_diff_density_min   -0.459
_refine_diff_density_rms    0.143

#===END

data_Compound2
 
_audit_creation_method            SHELXL-97
_chemical_name_systematic
;
 ?
;
_chemical_name_common             ?
_chemical_melting_point           ?
_chemical_formula_moiety          'C9 H12 N2 Ni O7'
_chemical_formula_sum
 'C9 H12 N2 Ni O7'
_chemical_formula_weight          318.89
 
loop_
 _atom_type_symbol
 _atom_type_description
 _atom_type_scat_dispersion_real
 _atom_type_scat_dispersion_imag
 _atom_type_scat_source
 'C'  'C'   0.0033   0.0016
 'International Tables Vol C Tables 4.2.6.8 and 6.1.1.4'
 'H'  'H'   0.0000   0.0000
 'International Tables Vol C Tables 4.2.6.8 and 6.1.1.4'
 'N'  'N'   0.0061   0.0033
 'International Tables Vol C Tables 4.2.6.8 and 6.1.1.4'
 'O'  'O'   0.0106   0.0060
 'International Tables Vol C Tables 4.2.6.8 and 6.1.1.4'
 'Ni'  'Ni'   0.3393   1.1124
 'International Tables Vol C Tables 4.2.6.8 and 6.1.1.4'
 
_symmetry_cell_setting            Orthorhombic
_symmetry_space_group_name_H-M    P21212
 
loop_
 _symmetry_equiv_pos_as_xyz
 'x, y, z'
 '-x, -y, z'
 'x+1/2, -y+1/2, -z'
 '-x+1/2, y+1/2, -z'
 
_cell_length_a                    26.1792(15)
_cell_length_b                    6.6400(4)
_cell_length_c                    7.6702(5)
_cell_angle_alpha                 90.00
_cell_angle_beta                  90.00
_cell_angle_gamma                 90.00
_cell_volume                      1333.31(14)
_cell_formula_units_Z             4
_cell_measurement_temperature     293(2)
_cell_measurement_reflns_used     ?
_cell_measurement_theta_min       2.7
_cell_measurement_theta_max       25.7
 
_exptl_crystal_description        reactangular
_exptl_crystal_colour             reddish-brown
_exptl_crystal_size_max           0.40
_exptl_crystal_size_mid           0.34
_exptl_crystal_size_min           0.28
_exptl_crystal_density_meas       ?
_exptl_crystal_density_diffrn     1.564
_exptl_crystal_density_method     'not measured'
_exptl_crystal_F_000              636
_exptl_absorpt_coefficient_mu     1.483
_exptl_absorpt_correction_type    Empirical
_exptl_absorpt_correction_T_min   0.865570
_exptl_absorpt_correction_T_max   0.9929
_exptl_absorpt_process_details     Sadabs
 
_exptl_special_details
;
 ?
;
 
_diffrn_ambient_temperature       293(2)
_diffrn_radiation_wavelength      0.71073
_diffrn_radiation_type            MoK\a
_diffrn_radiation_source          'fine-focus sealed tube'
_diffrn_radiation_monochromator   graphite
_diffrn_measurement_device_type   ?
_diffrn_measurement_method        ?
_diffrn_detector_area_resol_mean  ?
_diffrn_standards_number          ?
_diffrn_standards_interval_count  ?
_diffrn_standards_interval_time   ?
_diffrn_standards_decay_%         ?
_diffrn_reflns_number             12189
_diffrn_reflns_av_R_equivalents   0.0471
_diffrn_reflns_av_sigmaI/netI     0.0373
_diffrn_reflns_limit_h_min        -31
_diffrn_reflns_limit_h_max        31
_diffrn_reflns_limit_k_min        -8
_diffrn_reflns_limit_k_max        8
_diffrn_reflns_limit_l_min        -9
_diffrn_reflns_limit_l_max        9
_diffrn_reflns_theta_min          2.66
_diffrn_reflns_theta_max          25.69
_reflns_number_total              2538
_reflns_number_gt                 2072
_reflns_threshold_expression      >2sigma(I)
 
_computing_data_collection        'Bruker SMART'
_computing_cell_refinement        'Bruker SMART'
_computing_data_reduction         'Bruker SAINT'
_computing_structure_solution     'SHELXS-97 (Sheldrick, 1990)'
_computing_structure_refinement   'SHELXL-97 (Sheldrick, 1997)'
_computing_molecular_graphics     'Bruker SHELXTL'
_computing_publication_material   'Bruker SHELXTL'
 
_refine_special_details
;
 Refinement of F^2^ against ALL reflections.  The weighted R-factor wR and
 goodness of fit S are based on F^2^, conventional R-factors R are based
 on F, with F set to zero for negative F^2^. The threshold expression of
 F^2^ > 2sigma(F^2^) is used only for calculating R-factors(gt) etc. and is
 not relevant to the choice of reflections for refinement.  R-factors based
 on F^2^ are statistically about twice as large as those based on F, and R-
 factors based on ALL data will be even larger.
;
 
_refine_ls_structure_factor_coef  Fsqd
_refine_ls_matrix_type            full
_refine_ls_weighting_scheme       calc
_refine_ls_weighting_details
 'calc w=1/[\s^2^(Fo^2^)+(0.0667P)^2^+1.5740P] where P=(Fo^2^+2Fc^2^)/3'
_atom_sites_solution_primary      direct
_atom_sites_solution_secondary    difmap
_atom_sites_solution_hydrogens    geom
_refine_ls_hydrogen_treatment     noref
_refine_ls_extinction_method      none
_refine_ls_extinction_coef        ?
_refine_ls_abs_structure_details
 'Flack H D (1983), Acta Cryst. A39, 876-881'
_refine_ls_abs_structure_Flack    -0.02(5)
_refine_ls_number_reflns          2538
_refine_ls_number_parameters      162
_refine_ls_number_restraints      0
_refine_ls_R_factor_all           0.0618
_refine_ls_R_factor_gt            0.0458
_refine_ls_wR_factor_ref          0.1406
_refine_ls_wR_factor_gt           0.1324
_refine_ls_goodness_of_fit_ref    1.221
_refine_ls_restrained_S_all       1.221
_refine_ls_shift/su_max           0.000
_refine_ls_shift/su_mean          0.000
 
loop_
 _atom_site_label
 _atom_site_type_symbol
 _atom_site_fract_x
 _atom_site_fract_y
 _atom_site_fract_z
 _atom_site_U_iso_or_equiv
 _atom_site_adp_type
 _atom_site_occupancy
 _atom_site_symmetry_multiplicity
 _atom_site_calc_flag
 _atom_site_refinement_flags
 _atom_site_disorder_assembly
 _atom_site_disorder_group
Ni1 Ni 0.28323(2) -0.00194(11) 0.24640(9) 0.0196(2) Uani 1 1 d . . .
O2 O 0.18583(15) 0.2831(6) -0.0780(5) 0.0248(9) Uani 1 1 d . . .
O3 O 0.24867(15) 0.2066(7) 0.4047(5) 0.0287(10) Uani 1 1 d . . .
O4 O 0.18504(14) 0.3460(7) 0.5543(5) 0.0277(10) Uani 1 1 d . . .
O1 O 0.25776(15) 0.1500(7) 0.0277(5) 0.0266(10) Uani 1 1 d . . .
N1 N 0.34983(16) 0.1698(7) 0.2345(7) 0.0259(10) Uani 1 1 d . . .
C6 C 0.3911(2) 0.4853(10) 0.2766(7) 0.0311(13) Uani 1 1 d . . .
H6 H 0.3889 0.6192 0.3112 0.037 Uiso 1 1 calc R . .
O5 O 0.20781(14) -0.1206(6) 0.2184(5) 0.0225(9) Uani 1 1 d . . .
C2 C 0.1789(2) 0.0430(9) 0.1510(7) 0.0226(13) Uani 1 1 d . . .
H2 H 0.1487 -0.0108 0.0913 0.027 Uiso 1 1 calc R . .
C3 C 0.1614(2) 0.1705(10) 0.3024(7) 0.0255(13) Uani 1 1 d . . .
H3A H 0.1368 0.0930 0.3691 0.031 Uiso 1 1 calc R . .
H3B H 0.1435 0.2867 0.2558 0.031 Uiso 1 1 calc R . .
C1 C 0.2095(2) 0.1699(9) 0.0218(7) 0.0203(12) Uani 1 1 d . . .
N2 N 0.47900(19) 0.5437(8) 0.2188(8) 0.0405(15) Uani 1 1 d . . .
C4 C 0.2022(2) 0.2460(9) 0.4274(7) 0.0221(12) Uani 1 1 d . . .
C5 C 0.3489(2) 0.3623(9) 0.2826(8) 0.0290(14) Uani 1 1 d . . .
H5 H 0.3182 0.4162 0.3222 0.035 Uiso 1 1 calc R . .
C7 C 0.4358(2) 0.4090(9) 0.2200(9) 0.0325(15) Uani 1 1 d . . .
C9 C 0.3935(2) 0.0957(12) 0.1728(11) 0.048(2) Uani 1 1 d . . .
H9 H 0.3944 -0.0371 0.1343 0.057 Uiso 1 1 calc R . .
C8 C 0.4381(2) 0.2108(11) 0.1640(14) 0.059(3) Uani 1 1 d . . .
H8 H 0.4684 0.1561 0.1219 0.071 Uiso 1 1 calc R . .
O1W O 0.1247(13) 0.639(6) 0.367(4) 0.57(2) Uiso 1 1 d . . .
O2W O 0.0024(15) 0.338(4) 0.324(3) 0.469(16) Uiso 1 1 d . . .
 
loop_
 _atom_site_aniso_label
 _atom_site_aniso_U_11
 _atom_site_aniso_U_22
 _atom_site_aniso_U_33
 _atom_site_aniso_U_23
 _atom_site_aniso_U_13
 _atom_site_aniso_U_12
Ni1 0.0176(3) 0.0208(3) 0.0204(3) 0.0009(4) -0.0003(3) -0.0009(3)
O2 0.025(2) 0.025(2) 0.024(2) 0.0039(17) -0.0053(17) 0.0000(18)
O3 0.020(2) 0.033(3) 0.033(2) -0.008(2) -0.0011(17) -0.0002(19)
O4 0.025(2) 0.035(2) 0.023(2) -0.0068(19) -0.0004(17) -0.001(2)
O1 0.022(2) 0.032(2) 0.026(2) 0.0050(19) -0.0027(16) 0.0017(19)
N1 0.022(2) 0.026(2) 0.030(2) 0.000(2) 0.001(2) -0.0020(19)
C6 0.032(3) 0.024(3) 0.037(3) 0.001(4) 0.001(2) -0.006(3)
O5 0.0231(17) 0.022(2) 0.023(2) 0.0017(16) 0.0012(15) 0.0001(15)
C2 0.018(3) 0.029(4) 0.021(3) 0.000(2) 0.000(2) -0.003(2)
C3 0.018(3) 0.036(4) 0.022(3) -0.006(2) 0.000(2) -0.002(3)
C1 0.023(3) 0.020(3) 0.018(3) -0.003(2) 0.003(2) 0.000(3)
N2 0.027(2) 0.034(3) 0.060(4) -0.001(3) 0.002(2) -0.007(2)
C4 0.023(3) 0.021(3) 0.022(3) 0.001(2) 0.000(2) -0.003(2)
C5 0.023(3) 0.030(3) 0.034(3) -0.001(3) 0.000(2) -0.004(2)
C7 0.024(3) 0.026(3) 0.047(4) 0.001(3) 0.001(3) -0.006(2)
C9 0.025(3) 0.036(4) 0.083(5) -0.011(4) 0.011(3) -0.008(3)
C8 0.019(3) 0.037(4) 0.122(8) -0.018(5) 0.023(4) -0.007(3)
 
_geom_special_details
;
 All esds (except the esd in the dihedral angle between two l.s. planes)
 are estimated using the full covariance matrix.  The cell esds are taken
 into account individually in the estimation of esds in distances, angles
 and torsion angles; correlations between esds in cell parameters are only
 used when they are defined by crystal symmetry.  An approximate (isotropic)
 treatment of cell esds is used for estimating esds involving l.s. planes.
;
 
loop_
 _geom_bond_atom_site_label_1
 _geom_bond_atom_site_label_2
 _geom_bond_distance
 _geom_bond_site_symmetry_2
 _geom_bond_publ_flag
Ni1 O4 2.011(4) 4_546 ?
Ni1 O3 2.052(4) . ?
Ni1 O1 2.068(4) . ?
Ni1 N1 2.085(4) . ?
Ni1 O2 2.089(4) 4_545 ?
Ni1 O5 2.137(4) . ?
O2 C1 1.240(7) . ?
O2 Ni1 2.089(4) 4 ?
O3 C4 1.256(7) . ?
O4 C4 1.261(7) . ?
O4 Ni1 2.011(4) 4_556 ?
O1 C1 1.270(7) . ?
N1 C5 1.331(8) . ?
N1 C9 1.332(8) . ?
C6 C7 1.347(8) . ?
C6 C5 1.375(8) . ?
O5 C2 1.421(6) . ?
C2 C3 1.508(7) . ?
C2 C1 1.529(7) . ?
C3 C4 1.521(7) . ?
N2 N2 1.244(10) 2_665 ?
N2 C7 1.442(7) . ?
C7 C8 1.385(10) . ?
C9 C8 1.397(9) . ?
 
loop_
 _geom_angle_atom_site_label_1
 _geom_angle_atom_site_label_2
 _geom_angle_atom_site_label_3
 _geom_angle
 _geom_angle_site_symmetry_1
 _geom_angle_site_symmetry_3
 _geom_angle_publ_flag
O4 Ni1 O3 94.10(17) 4_546 . ?
O4 Ni1 O1 173.98(16) 4_546 . ?
O3 Ni1 O1 90.48(19) . . ?
O4 Ni1 N1 87.86(18) 4_546 . ?
O3 Ni1 N1 91.46(17) . . ?
O1 Ni1 N1 88.12(18) . . ?
O4 Ni1 O2 88.08(17) 4_546 4_545 ?
O3 Ni1 O2 176.56(15) . 4_545 ?
O1 Ni1 O2 87.53(16) . 4_545 ?
N1 Ni1 O2 91.28(18) . 4_545 ?
O4 Ni1 O5 105.84(16) 4_546 . ?
O3 Ni1 O5 84.32(15) . . ?
O1 Ni1 O5 78.48(15) . . ?
N1 Ni1 O5 165.89(17) . . ?
O2 Ni1 O5 92.53(15) 4_545 . ?
C1 O2 Ni1 127.0(4) . 4 ?
C4 O3 Ni1 130.5(4) . . ?
C4 O4 Ni1 134.7(4) . 4_556 ?
C1 O1 Ni1 113.6(3) . . ?
C5 N1 C9 118.0(5) . . ?
C5 N1 Ni1 119.9(4) . . ?
C9 N1 Ni1 122.1(4) . . ?
C7 C6 C5 119.1(6) . . ?
C2 O5 Ni1 104.3(3) . . ?
O5 C2 C3 108.1(4) . . ?
O5 C2 C1 112.1(4) . . ?
C3 C2 C1 110.4(5) . . ?
C2 C3 C4 117.2(4) . . ?
O2 C1 O1 125.7(5) . . ?
O2 C1 C2 118.1(5) . . ?
O1 C1 C2 116.2(5) . . ?
N2 N2 C7 113.8(7) 2_665 . ?
O3 C4 O4 124.2(5) . . ?
O3 C4 C3 121.6(5) . . ?
O4 C4 C3 114.2(5) . . ?
N1 C5 C6 123.1(5) . . ?
C6 C7 C8 119.6(6) . . ?
C6 C7 N2 116.7(6) . . ?
C8 C7 N2 123.6(6) . . ?
N1 C9 C8 122.2(7) . . ?
C7 C8 C9 118.0(6) . . ?
 
_diffrn_measured_fraction_theta_max    0.999
_diffrn_reflns_theta_full              25.69
_diffrn_measured_fraction_theta_full   0.999
_refine_diff_density_max    0.947
_refine_diff_density_min   -0.341
_refine_diff_density_rms    0.120


#===END

 
data_Compound3
 
_audit_creation_method            SHELXL-97
_chemical_name_systematic
;
 ?
;
_chemical_name_common             ?
_chemical_melting_point           ?
_chemical_formula_moiety          'C10 H10 Co N O6'
_chemical_formula_sum
 'C10 H10 Co N O6'
_chemical_formula_weight          299.12
 
loop_
 _atom_type_symbol
 _atom_type_description
 _atom_type_scat_dispersion_real
 _atom_type_scat_dispersion_imag
 _atom_type_scat_source
 'C'  'C'   0.0033   0.0016
 'International Tables Vol C Tables 4.2.6.8 and 6.1.1.4'
 'H'  'H'   0.0000   0.0000
 'International Tables Vol C Tables 4.2.6.8 and 6.1.1.4'
 'N'  'N'   0.0061   0.0033
 'International Tables Vol C Tables 4.2.6.8 and 6.1.1.4'
 'O'  'O'   0.0106   0.0060
 'International Tables Vol C Tables 4.2.6.8 and 6.1.1.4'
 'Co'  'Co'   0.3494   0.9721
 'International Tables Vol C Tables 4.2.6.8 and 6.1.1.4'
 
_symmetry_cell_setting            Orthorhombic
_symmetry_space_group_name_H-M    P21212
 
loop_
 _symmetry_equiv_pos_as_xyz
 'x, y, z'
 '-x, -y, z'
 'x+1/2, -y+1/2, -z'
 '-x+1/2, y+1/2, -z'
 
_cell_length_a                    27.1331(9)
_cell_length_b                    6.7002(2)
_cell_length_c                    7.6817(3)
_cell_angle_alpha                 90.00
_cell_angle_beta                  90.00
_cell_angle_gamma                 90.00
_cell_volume                      1396.51(8)
_cell_formula_units_Z             4
_cell_measurement_temperature     293(2)
_cell_measurement_reflns_used     ?
_cell_measurement_theta_min       ?
_cell_measurement_theta_max       ?
 
_exptl_crystal_description        Reactangular
_exptl_crystal_colour             red
_exptl_crystal_size_max           0.42
_exptl_crystal_size_mid           0.36
_exptl_crystal_size_min           0.21
_exptl_crystal_density_meas       ?
_exptl_crystal_density_diffrn     1.413
_exptl_crystal_density_method     'not measured'
_exptl_crystal_F_000              600
_exptl_absorpt_coefficient_mu     1.244
_exptl_absorpt_correction_type    empirical
_exptl_absorpt_correction_T_min   0.77072
_exptl_absorpt_correction_T_max   0.9625
_exptl_absorpt_process_details    sadabs
 
_exptl_special_details
;
 ?
;
 
_diffrn_ambient_temperature       293(2)
_diffrn_radiation_wavelength      0.71073
_diffrn_radiation_type            MoK\a
_diffrn_radiation_source          'fine-focus sealed tube'
_diffrn_radiation_monochromator   graphite
_diffrn_measurement_device_type   ?
_diffrn_measurement_method        ?
_diffrn_detector_area_resol_mean  ?
_diffrn_standards_number          ?
_diffrn_standards_interval_count  ?
_diffrn_standards_interval_time   ?
_diffrn_standards_decay_%         ?
_diffrn_reflns_number             13273
_diffrn_reflns_av_R_equivalents   0.0815
_diffrn_reflns_av_sigmaI/netI     0.0624
_diffrn_reflns_limit_h_min        -33
_diffrn_reflns_limit_h_max        32
_diffrn_reflns_limit_k_min        -8
_diffrn_reflns_limit_k_max        8
_diffrn_reflns_limit_l_min        -9
_diffrn_reflns_limit_l_max        5
_diffrn_reflns_theta_min          1.50
_diffrn_reflns_theta_max          25.67
_reflns_number_total              2659
_reflns_number_gt                 1802
_reflns_threshold_expression      >2sigma(I)
 
_computing_data_collection        'Bruker SMART'
_computing_cell_refinement        'Bruker SMART'
_computing_data_reduction         'Bruker SAINT'
_computing_structure_solution     'SHELXS-97 (Sheldrick, 1990)'
_computing_structure_refinement   'SHELXL-97 (Sheldrick, 1997)'
_computing_molecular_graphics     'Bruker SHELXTL'
_computing_publication_material   'Bruker SHELXTL'
 
_refine_special_details
;
 Refinement of F^2^ against ALL reflections.  The weighted R-factor wR and
 goodness of fit S are based on F^2^, conventional R-factors R are based
 on F, with F set to zero for negative F^2^. The threshold expression of
 F^2^ > 2sigma(F^2^) is used only for calculating R-factors(gt) etc. and is
 not relevant to the choice of reflections for refinement.  R-factors based
 on F^2^ are statistically about twice as large as those based on F, and R-
 factors based on ALL data will be even larger.
;
 
_refine_ls_structure_factor_coef  Fsqd
_refine_ls_matrix_type            full
_refine_ls_weighting_scheme       calc
_refine_ls_weighting_details
 'calc w=1/[\s^2^(Fo^2^)+(0.1243P)^2^+0.1681P] where P=(Fo^2^+2Fc^2^)/3'
_atom_sites_solution_primary      direct
_atom_sites_solution_secondary    difmap
_atom_sites_solution_hydrogens    geom
_refine_ls_hydrogen_treatment     noref
_refine_ls_extinction_method      none
_refine_ls_extinction_coef        ?
_refine_ls_abs_structure_details
 'Flack H D (1983), Acta Cryst. A39, 876-881'
_refine_ls_abs_structure_Flack    -0.05(8)
_refine_ls_number_reflns          2659
_refine_ls_number_parameters      160
_refine_ls_number_restraints      0
_refine_ls_R_factor_all           0.1019
_refine_ls_R_factor_gt            0.0626
_refine_ls_wR_factor_ref          0.2165
_refine_ls_wR_factor_gt           0.1905
_refine_ls_goodness_of_fit_ref    1.121
_refine_ls_restrained_S_all       1.121
_refine_ls_shift/su_max           0.000
_refine_ls_shift/su_mean          0.000
 
loop_
 _atom_site_label
 _atom_site_type_symbol
 _atom_site_fract_x
 _atom_site_fract_y
 _atom_site_fract_z
 _atom_site_U_iso_or_equiv
 _atom_site_adp_type
 _atom_site_occupancy
 _atom_site_symmetry_multiplicity
 _atom_site_calc_flag
 _atom_site_refinement_flags
 _atom_site_disorder_assembly
 _atom_site_disorder_group
Co1 Co 0.71742(3) 0.99587(15) 0.75034(12) 0.0308(3) Uani 1 1 d . . .
O4 O 0.6870(2) 0.7777(9) -0.0781(7) 0.0374(14) Uani 1 1 d . . .
O5 O 0.70800(19) 0.3758(8) 0.2184(7) 0.0370(13) Uani 1 1 d . . .
O3 O 0.7564(2) 0.6435(9) 0.0245(7) 0.0392(14) Uani 1 1 d . . .
O2 O 0.7479(2) 0.7103(9) 0.3998(7) 0.0431(15) Uani 1 1 d . . .
O1 O 0.6861(2) 0.8416(9) 0.5511(7) 0.0408(15) Uani 1 1 d . . .
N1 N 0.6519(2) 1.1695(9) 0.7683(9) 0.0395(15) Uani 1 1 d . . .
C8 C 0.6106(3) 1.4840(13) 0.7253(10) 0.0434(19) Uani 1 1 d . . .
H8 H 0.6126 1.6163 0.6895 0.052 Uiso 1 1 calc R . .
C3 C 0.6805(3) 0.5422(12) 0.1503(9) 0.036(2) Uani 1 1 d . . .
H3 H 0.6513 0.4896 0.0904 0.043 Uiso 1 1 calc R . .
C1 C 0.7028(3) 0.7468(13) 0.4251(11) 0.040(2) Uani 1 1 d . . .
C7 C 0.5670(3) 1.4061(13) 0.7854(14) 0.053(3) Uani 1 1 d . . .
C6 C 0.5666(4) 1.2059(15) 0.8428(19) 0.080(4) Uani 1 1 d . . .
H6 H 0.5376 1.1479 0.8834 0.096 Uiso 1 1 calc R . .
C2 C 0.6629(3) 0.6703(13) 0.3024(10) 0.039(2) Uani 1 1 d . . .
H2A H 0.6454 0.7844 0.2557 0.047 Uiso 1 1 calc R . .
H2B H 0.6395 0.5929 0.3701 0.047 Uiso 1 1 calc R . .
C9 C 0.6519(3) 1.3593(12) 0.7193(10) 0.041(2) Uani 1 1 d . . .
H9 H 0.6813 1.4130 0.6783 0.049 Uiso 1 1 calc R . .
C4 C 0.7099(3) 0.6666(12) 0.0204(10) 0.0344(18) Uani 1 1 d . . .
C5 C 0.6104(3) 1.0966(16) 0.8373(15) 0.063(3) Uani 1 1 d . . .
H5 H 0.6107 0.9682 0.8833 0.076 Uiso 1 1 calc R . .
C10 C 0.5229(3) 1.5316(16) 0.7845(13) 0.058(3) Uani 1 1 d . . .
H10 H 0.5278 1.6690 0.7838 0.069 Uiso 1 1 calc R . .
O1W O 0.5000 1.0000 1.46(2) 0.87(9) Uiso 1 2 d S . .
O1WA O 0.5226(14) 0.878(6) 1.324(6) 0.221(16) Uiso 0.50 1 d P . .
 
loop_
 _atom_site_aniso_label
 _atom_site_aniso_U_11
 _atom_site_aniso_U_22
 _atom_site_aniso_U_33
 _atom_site_aniso_U_23
 _atom_site_aniso_U_13
 _atom_site_aniso_U_12
Co1 0.0306(5) 0.0338(5) 0.0278(5) -0.0015(7) 0.0000(4) 0.0013(4)
O4 0.040(4) 0.041(3) 0.031(3) 0.001(3) -0.004(3) -0.003(3)
O5 0.034(3) 0.041(3) 0.035(3) 0.000(2) 0.000(2) -0.002(2)
O3 0.035(3) 0.046(3) 0.036(3) 0.005(3) -0.001(2) 0.002(3)
O2 0.035(4) 0.049(4) 0.046(3) -0.014(3) -0.005(3) 0.003(3)
O1 0.044(4) 0.048(3) 0.030(3) -0.010(3) 0.002(3) -0.005(3)
N1 0.040(4) 0.031(3) 0.048(4) -0.001(4) -0.004(4) 0.003(3)
C8 0.043(4) 0.044(4) 0.044(5) -0.009(5) -0.002(4) 0.008(4)
C3 0.038(5) 0.045(5) 0.025(4) 0.001(3) -0.005(3) -0.005(4)
C1 0.049(6) 0.034(4) 0.039(5) 0.001(4) -0.003(4) 0.000(4)
C7 0.041(5) 0.044(5) 0.073(7) -0.003(5) 0.003(5) 0.010(4)
C6 0.058(7) 0.042(6) 0.140(11) 0.024(7) 0.034(7) 0.013(5)
C2 0.029(4) 0.050(5) 0.038(4) -0.009(4) -0.006(3) 0.001(4)
C9 0.040(4) 0.042(4) 0.041(5) -0.001(4) -0.005(4) 0.001(4)
C4 0.038(5) 0.032(4) 0.033(4) -0.003(4) -0.004(4) -0.004(4)
C5 0.041(6) 0.054(6) 0.095(8) 0.015(6) 0.022(6) -0.003(5)
C10 0.045(5) 0.058(6) 0.070(6) -0.005(6) 0.001(4) 0.011(5)
 
_geom_special_details
;
 All esds (except the esd in the dihedral angle between two l.s. planes)
 are estimated using the full covariance matrix.  The cell esds are taken
 into account individually in the estimation of esds in distances, angles
 and torsion angles; correlations between esds in cell parameters are only
 used when they are defined by crystal symmetry.  An approximate (isotropic)
 treatment of cell esds is used for estimating esds involving l.s. planes.
;
 
loop_
 _geom_bond_atom_site_label_1
 _geom_bond_atom_site_label_2
 _geom_bond_distance
 _geom_bond_site_symmetry_2
 _geom_bond_publ_flag
Co1 O1 2.033(5) . ?
Co1 O2 2.068(6) 4_656 ?
Co1 O3 2.116(5) 4_656 ?
Co1 N1 2.128(6) . ?
Co1 O4 2.134(6) 1_556 ?
Co1 O5 2.191(5) 4_656 ?
O4 C4 1.230(9) . ?
O4 Co1 2.134(6) 1_554 ?
O5 C3 1.440(9) . ?
O5 Co1 2.191(5) 4_646 ?
O3 C4 1.272(10) . ?
O3 Co1 2.116(5) 4_646 ?
O2 C1 1.263(10) . ?
O2 Co1 2.068(6) 4_646 ?
O1 C1 1.243(10) . ?
N1 C9 1.326(10) . ?
N1 C5 1.338(11) . ?
C8 C7 1.372(13) . ?
C8 C9 1.398(11) . ?
C3 C4 1.526(10) . ?
C3 C2 1.526(10) . ?
C1 C2 1.524(11) . ?
C7 C6 1.412(13) . ?
C7 C10 1.462(12) . ?
C6 C5 1.397(14) . ?
C10 C10 1.315(19) 2_685 ?
O1W O1WA 1.44(10) 2_675 ?
O1W O1WA 1.44(10) . ?
 
loop_
 _geom_angle_atom_site_label_1
 _geom_angle_atom_site_label_2
 _geom_angle_atom_site_label_3
 _geom_angle
 _geom_angle_site_symmetry_1
 _geom_angle_site_symmetry_3
 _geom_angle_publ_flag
O1 Co1 O2 97.1(2) . 4_656 ?
O1 Co1 O3 173.6(2) . 4_656 ?
O2 Co1 O3 88.8(3) 4_656 4_656 ?
O1 Co1 N1 88.7(2) . . ?
O2 Co1 N1 92.1(2) 4_656 . ?
O3 Co1 N1 88.4(2) 4_656 . ?
O1 Co1 O4 87.4(2) . 1_556 ?
O2 Co1 O4 174.8(2) 4_656 1_556 ?
O3 Co1 O4 86.9(2) 4_656 1_556 ?
N1 Co1 O4 90.6(2) . 1_556 ?
O1 Co1 O5 106.4(2) . 4_656 ?
O2 Co1 O5 84.0(2) 4_656 4_656 ?
O3 Co1 O5 76.8(2) 4_656 4_656 ?
N1 Co1 O5 164.7(2) . 4_656 ?
O4 Co1 O5 92.2(2) 1_556 4_656 ?
C4 O4 Co1 126.8(6) . 1_554 ?
C3 O5 Co1 103.6(4) . 4_646 ?
C4 O3 Co1 114.2(5) . 4_646 ?
C1 O2 Co1 131.4(6) . 4_646 ?
C1 O1 Co1 133.9(6) . . ?
C9 N1 C5 117.5(7) . . ?
C9 N1 Co1 120.5(6) . . ?
C5 N1 Co1 122.0(6) . . ?
C7 C8 C9 118.3(8) . . ?
O5 C3 C4 112.9(6) . . ?
O5 C3 C2 108.6(6) . . ?
C4 C3 C2 110.9(6) . . ?
O1 C1 O2 124.9(8) . . ?
O1 C1 C2 113.2(8) . . ?
O2 C1 C2 121.8(8) . . ?
C8 C7 C6 118.3(9) . . ?
C8 C7 C10 119.0(8) . . ?
C6 C7 C10 122.7(9) . . ?
C5 C6 C7 118.8(10) . . ?
C1 C2 C3 116.2(7) . . ?
N1 C9 C8 124.4(8) . . ?
O4 C4 O3 126.1(7) . . ?
O4 C4 C3 118.0(7) . . ?
O3 C4 C3 115.9(7) . . ?
N1 C5 C6 122.5(9) . . ?
C10 C10 C7 126.1(12) 2_685 . ?
O1WA O1W O1WA 90(10) 2_675 . ?
 
_diffrn_measured_fraction_theta_max    1.000
_diffrn_reflns_theta_full              25.67
_diffrn_measured_fraction_theta_full   1.000
_refine_diff_density_max    1.208
_refine_diff_density_min   -0.664
_refine_diff_density_rms    0.277


#===END

 
data_Compound4
 
_audit_creation_method            SHELXL-97
_chemical_name_systematic
;
 ?
;
_chemical_name_common             ?
_chemical_melting_point           ?
_chemical_formula_moiety          'C10 H10 Ni N O6'
_chemical_formula_sum
 'C10 H10 Ni N O6'
_chemical_formula_weight          298.88
 
loop_
 _atom_type_symbol
 _atom_type_description
 _atom_type_scat_dispersion_real
 _atom_type_scat_dispersion_imag
 _atom_type_scat_source
 'C'  'C'   0.0033   0.0016
 'International Tables Vol C Tables 4.2.6.8 and 6.1.1.4'
 'H'  'H'   0.0000   0.0000
 'International Tables Vol C Tables 4.2.6.8 and 6.1.1.4'
 'N'  'N'   0.0061   0.0033
 'International Tables Vol C Tables 4.2.6.8 and 6.1.1.4'
 'O'  'O'   0.0106   0.0060
 'International Tables Vol C Tables 4.2.6.8 and 6.1.1.4'
 'Ni'  'Ni'   0.3393   1.1124
 'International Tables Vol C Tables 4.2.6.8 and 6.1.1.4'
 
_symmetry_cell_setting            Orthorhombic
_symmetry_space_group_name_H-M    P21212
 
loop_
 _symmetry_equiv_pos_as_xyz
 'x, y, z'
 '-x, -y, z'
 'x+1/2, -y+1/2, -z'
 '-x+1/2, y+1/2, -z'
 
_cell_length_a                    26.9967(9)
_cell_length_b                    6.6856(2)
_cell_length_c                    7.6377(3)
_cell_angle_alpha                 90.00
_cell_angle_beta                  90.00
_cell_angle_gamma                 90.00
_cell_volume                      1378.52(8)
_cell_formula_units_Z             4
_cell_measurement_temperature     293(2)
_cell_measurement_reflns_used     ?
_cell_measurement_theta_min       1.5
_cell_measurement_theta_max       25.7
 
_exptl_crystal_description        reactangular
_exptl_crystal_colour             Green
_exptl_crystal_size_max           0.36
_exptl_crystal_size_mid           0.25
_exptl_crystal_size_min           0.16
_exptl_crystal_density_meas       ?
_exptl_crystal_density_diffrn     1.430
_exptl_crystal_density_method     'not measured'
_exptl_crystal_F_000              604
_exptl_absorpt_coefficient_mu     1.423
_exptl_absorpt_correction_type    Empirical
_exptl_absorpt_correction_T_min   0.769758
_exptl_absorpt_correction_T_max   0.9947
_exptl_absorpt_process_details    Sadabs
 
_exptl_special_details
;
 ?
;
 
_diffrn_ambient_temperature       293(2)
_diffrn_radiation_wavelength      0.71073
_diffrn_radiation_type            MoK\a
_diffrn_radiation_source          'fine-focus sealed tube'
_diffrn_radiation_monochromator   graphite
_diffrn_measurement_device_type   ?
_diffrn_measurement_method        ?
_diffrn_detector_area_resol_mean  ?
_diffrn_standards_number          ?
_diffrn_standards_interval_count  ?
_diffrn_standards_interval_time   ?
_diffrn_standards_decay_%         ?
_diffrn_reflns_number             17790
_diffrn_reflns_av_R_equivalents   0.0531
_diffrn_reflns_av_sigmaI/netI     0.0324
_diffrn_reflns_limit_h_min        -32
_diffrn_reflns_limit_h_max        32
_diffrn_reflns_limit_k_min        -8
_diffrn_reflns_limit_k_max        8
_diffrn_reflns_limit_l_min        -9
_diffrn_reflns_limit_l_max        9
_diffrn_reflns_theta_min          1.51
_diffrn_reflns_theta_max          25.68
_reflns_number_total              2626
_reflns_number_gt                 2467
_reflns_threshold_expression      >2sigma(I)
 
_computing_data_collection        'Bruker SMART'
_computing_cell_refinement        'Bruker SMART'
_computing_data_reduction         'Bruker SAINT'
_computing_structure_solution     'SHELXS-97 (Sheldrick, 1990)'
_computing_structure_refinement   'SHELXL-97 (Sheldrick, 1997)'
_computing_molecular_graphics     'Bruker SHELXTL'
_computing_publication_material   'Bruker SHELXTL'
 
_refine_special_details
;
 Refinement of F^2^ against ALL reflections.  The weighted R-factor wR and
 goodness of fit S are based on F^2^, conventional R-factors R are based
 on F, with F set to zero for negative F^2^. The threshold expression of
 F^2^ > 2sigma(F^2^) is used only for calculating R-factors(gt) etc. and is
 not relevant to the choice of reflections for refinement.  R-factors based
 on F^2^ are statistically about twice as large as those based on F, and R-
 factors based on ALL data will be even larger.
;
 
_refine_ls_structure_factor_coef  Fsqd
_refine_ls_matrix_type            full
_refine_ls_weighting_scheme       calc
_refine_ls_weighting_details
 'calc w=1/[\s^2^(Fo^2^)+(0.1203P)^2^+7.2885P] where P=(Fo^2^+2Fc^2^)/3'
_atom_sites_solution_primary      direct
_atom_sites_solution_secondary    difmap
_atom_sites_solution_hydrogens    geom
_refine_ls_hydrogen_treatment     noref
_refine_ls_extinction_method      none
_refine_ls_extinction_coef        ?
_refine_ls_abs_structure_details
 'Flack H D (1983), Acta Cryst. A39, 876-881'
_refine_ls_abs_structure_Flack    0.05(8)
_refine_ls_number_reflns          2626
_refine_ls_number_parameters      158
_refine_ls_number_restraints      0
_refine_ls_R_factor_all           0.0835
_refine_ls_R_factor_gt            0.0807
_refine_ls_wR_factor_ref          0.2599
_refine_ls_wR_factor_gt           0.2581
_refine_ls_goodness_of_fit_ref    1.306
_refine_ls_restrained_S_all       1.306
_refine_ls_shift/su_max           0.000
_refine_ls_shift/su_mean          0.000
 
loop_
 _atom_site_label
 _atom_site_type_symbol
 _atom_site_fract_x
 _atom_site_fract_y
 _atom_site_fract_z
 _atom_site_U_iso_or_equiv
 _atom_site_adp_type
 _atom_site_occupancy
 _atom_site_symmetry_multiplicity
 _atom_site_calc_flag
 _atom_site_refinement_flags
 _atom_site_disorder_assembly
 _atom_site_disorder_group
Ni1 Ni 0.71758(3) 0.50035(17) 0.25396(13) 0.0254(4) Uani 1 1 d . . .
O5 O 0.7906(2) 0.3824(8) 0.2807(8) 0.0266(13) Uani 1 1 d . . .
O2 O 0.7513(2) 0.7089(10) 0.0957(8) 0.0298(14) Uani 1 1 d . . .
O4 O 0.6880(2) 0.2842(10) 0.4200(8) 0.0274(14) Uani 1 1 d . . .
O3 O 0.7424(2) 0.6506(10) 0.4741(8) 0.0299(14) Uani 1 1 d . . .
O1 O 0.6872(2) 0.3492(11) 0.0517(8) 0.0311(14) Uani 1 1 d . . .
N1 N 0.6536(2) 0.6705(11) 0.2669(10) 0.0275(15) Uani 1 1 d . . .
C7 C 0.5678(4) 0.9043(16) 0.2852(16) 0.041(3) Uani 1 1 d . . .
C6 C 0.5677(4) 0.7049(18) 0.340(2) 0.067(5) Uani 1 1 d . . .
H6 H 0.5387 0.6461 0.3810 0.081 Uiso 1 1 calc R . .
C3 C 0.8191(3) 0.5453(12) 0.3459(12) 0.0269(19) Uani 1 1 d . . .
H3 H 0.8486 0.4924 0.4049 0.032 Uiso 1 1 calc R . .
C8 C 0.6115(3) 0.9778(14) 0.2288(13) 0.036(2) Uani 1 1 d . . .
H8 H 0.6135 1.1116 0.1963 0.043 Uiso 1 1 calc R . .
C5 C 0.6102(4) 0.5983(17) 0.3321(19) 0.050(3) Uani 1 1 d . . .
H5 H 0.6098 0.4677 0.3739 0.060 Uiso 1 1 calc R . .
C9 C 0.6531(4) 0.8608(14) 0.2181(11) 0.0308(19) Uani 1 1 d . . .
H9 H 0.6821 0.9173 0.1748 0.037 Uiso 1 1 calc R . .
C1 C 0.7961(3) 0.7474(14) 0.0733(12) 0.0261(19) Uani 1 1 d . . .
C10 C 0.5233(4) 1.0319(16) 0.2869(17) 0.047(3) Uani 1 1 d . . .
H10 H 0.5283 1.1695 0.2881 0.056 Uiso 1 1 calc R . .
C2 C 0.8351(3) 0.6717(15) 0.1968(11) 0.0278(19) Uani 1 1 d . . .
H2A H 0.8589 0.5958 0.1289 0.033 Uiso 1 1 calc R . .
H2B H 0.8524 0.7868 0.2442 0.033 Uiso 1 1 calc R . .
C4 C 0.7112(3) 0.1732(12) 0.5208(10) 0.0232(18) Uani 1 1 d . . .
O1W O 0.6340(10) 0.633(5) 0.870(4) 0.225(12) Uiso 1 1 d . . .
 
loop_
 _atom_site_aniso_label
 _atom_site_aniso_U_11
 _atom_site_aniso_U_22
 _atom_site_aniso_U_33
 _atom_site_aniso_U_23
 _atom_site_aniso_U_13
 _atom_site_aniso_U_12
Ni1 0.0267(6) 0.0243(6) 0.0252(6) -0.0010(6) 0.0002(4) 0.0013(4)
O5 0.034(3) 0.016(3) 0.029(3) -0.004(2) 0.006(3) -0.003(2)
O2 0.028(3) 0.031(3) 0.030(3) 0.008(3) 0.001(3) 0.002(3)
O4 0.034(3) 0.029(3) 0.019(3) -0.001(3) -0.008(2) 0.002(3)
O3 0.037(4) 0.033(4) 0.019(3) -0.005(3) 0.001(2) -0.004(3)
O1 0.035(3) 0.036(4) 0.023(3) 0.001(3) -0.002(3) 0.002(3)
N1 0.027(3) 0.027(4) 0.028(4) -0.002(3) 0.004(3) 0.004(3)
C7 0.036(5) 0.033(5) 0.054(7) -0.002(5) -0.002(5) 0.004(4)
C6 0.029(5) 0.042(6) 0.131(13) 0.031(8) 0.037(7) 0.015(5)
C3 0.029(4) 0.020(4) 0.032(4) -0.008(3) -0.001(3) 0.003(3)
C8 0.041(5) 0.024(4) 0.042(5) -0.002(5) 0.007(4) 0.002(4)
C5 0.028(5) 0.033(6) 0.089(9) 0.016(6) 0.011(5) 0.002(4)
C9 0.039(5) 0.030(4) 0.023(4) 0.003(4) -0.001(4) 0.004(4)
C1 0.029(5) 0.026(4) 0.024(4) 0.001(4) 0.007(3) 0.004(4)
C10 0.044(5) 0.031(5) 0.067(7) -0.006(5) -0.001(5) 0.010(4)
C2 0.025(4) 0.036(5) 0.023(4) 0.003(4) 0.002(3) 0.003(4)
C4 0.032(5) 0.018(4) 0.019(4) 0.000(3) 0.004(3) -0.002(4)
 
_geom_special_details
;
 All esds (except the esd in the dihedral angle between two l.s. planes)
 are estimated using the full covariance matrix.  The cell esds are taken
 into account individually in the estimation of esds in distances, angles
 and torsion angles; correlations between esds in cell parameters are only
 used when they are defined by crystal symmetry.  An approximate (isotropic)
 treatment of cell esds is used for estimating esds involving l.s. planes.
;
 
loop_
 _geom_bond_atom_site_label_1
 _geom_bond_atom_site_label_2
 _geom_bond_distance
 _geom_bond_site_symmetry_2
 _geom_bond_publ_flag
Ni1 O1 2.021(6) . ?
Ni1 O2 2.058(6) . ?
Ni1 N1 2.070(7) . ?
Ni1 O3 2.070(6) . ?
Ni1 O4 2.082(7) . ?
Ni1 O5 2.133(6) . ?
O5 C3 1.425(10) . ?
O2 C1 1.249(11) . ?
O4 C4 1.240(11) . ?
O3 C4 1.262(11) 4_656 ?
O1 C1 1.256(11) 4_645 ?
N1 C9 1.326(12) . ?
N1 C5 1.362(12) . ?
C7 C8 1.348(14) . ?
C7 C6 1.397(16) . ?
C7 C10 1.474(14) . ?
C6 C5 1.353(15) . ?
C3 C2 1.482(12) . ?
C3 C4 1.562(11) 4_656 ?
C8 C9 1.370(13) . ?
C1 O1 1.256(11) 4_655 ?
C1 C2 1.501(12) . ?
C10 C10 1.33(2) 2_675 ?
C4 O3 1.262(11) 4_646 ?
C4 C3 1.562(11) 4_646 ?
 
loop_
 _geom_angle_atom_site_label_1
 _geom_angle_atom_site_label_2
 _geom_angle_atom_site_label_3
 _geom_angle
 _geom_angle_site_symmetry_1
 _geom_angle_site_symmetry_3
 _geom_angle_publ_flag
O1 Ni1 O2 94.0(3) . . ?
O1 Ni1 N1 88.4(3) . . ?
O2 Ni1 N1 91.4(3) . . ?
O1 Ni1 O3 174.5(3) . . ?
O2 Ni1 O3 90.3(3) . . ?
N1 Ni1 O3 88.0(3) . . ?
O1 Ni1 O4 87.9(3) . . ?
O2 Ni1 O4 176.3(2) . . ?
N1 Ni1 O4 91.8(3) . . ?
O3 Ni1 O4 88.1(2) . . ?
O1 Ni1 O5 105.3(2) . . ?
O2 Ni1 O5 84.2(2) . . ?
N1 Ni1 O5 165.8(3) . . ?
O3 Ni1 O5 78.6(3) . . ?
O4 Ni1 O5 92.3(2) . . ?
C3 O5 Ni1 104.5(5) . . ?
C1 O2 Ni1 130.4(6) . . ?
C4 O4 Ni1 126.8(6) . . ?
C4 O3 Ni1 113.8(5) 4_656 . ?
C1 O1 Ni1 134.9(6) 4_645 . ?
C9 N1 C5 115.6(8) . . ?
C9 N1 Ni1 121.6(6) . . ?
C5 N1 Ni1 122.7(6) . . ?
C8 C7 C6 116.5(9) . . ?
C8 C7 C10 120.3(10) . . ?
C6 C7 C10 123.2(10) . . ?
C5 C6 C7 119.1(10) . . ?
O5 C3 C2 108.9(7) . . ?
O5 C3 C4 111.2(7) . 4_656 ?
C2 C3 C4 109.9(7) . 4_656 ?
C7 C8 C9 121.8(9) . . ?
C6 C5 N1 124.1(10) . . ?
N1 C9 C8 122.7(9) . . ?
O2 C1 O1 124.3(8) . 4_655 ?
O2 C1 C2 121.6(8) . . ?
O1 C1 C2 114.1(7) 4_655 . ?
C10 C10 C7 125.9(13) 2_675 . ?
C3 C2 C1 118.2(7) . . ?
O4 C4 O3 126.4(8) . 4_646 ?
O4 C4 C3 117.8(8) . 4_646 ?
O3 C4 C3 115.8(7) 4_646 4_646 ?
 
_diffrn_measured_fraction_theta_max    0.999
_diffrn_reflns_theta_full              25.68
_diffrn_measured_fraction_theta_full   0.999
_refine_diff_density_max    1.524
_refine_diff_density_min   -0.802
_refine_diff_density_rms    0.287
